# Supplementary material for: Combining school-catchment area models with geostatistical models for analysing school survey data from low-resource settings: Inferential benefits and limitations
Source: PubMed Central journal article supplement (PMC7613137; doi:10.1016/j.spasta.2022.100679), 2022-06-29
Supplement: EMS147098-supplement-Supplementary_material_2.pdf [file EMS147098-supplement-Supplementary_material_2.pdf]

# Supplementary material 2: Combining school-catchment area models with geostatistical models for analysing school survey data from low-resource settings: inferential benefits and limitations

Peter M. Macharia<sup>a,b,\*</sup>, Nicolas Ray<sup>c,d</sup>, Caroline W. Gitonga<sup>b</sup>, Robert W. Snow<sup>b,e</sup>, Emanuele Giorgi<sup>a</sup>

<sup>a</sup>*Centre for Health Informatics, Computing, and Statistics, Lancaster Medical School, Lancaster University, Lancaster, LA1 4YW, UK*

<sup>b</sup>*Population Health Unit, Kenya Medical Research Institute-Wellcome Trust Research Programme, PO, Box 43640, Nairobi, Kenya*

<sup>c</sup>*GeoHealth group, Institute of Global Health, University of Geneva, Geneva, Switzerland*

<sup>d</sup>*Institute for Environmental Sciences, University of Geneva, Geneva, Switzerland*

<sup>e</sup>*Centre for Tropical Medicine and Global Health, Nuffield Department of Medicine, University of Oxford, Oxford, OX3 7LG, UK*

---

---

---

\*Corresponding author

*Email address:* pmacharia@kemri-wellcome.org (Peter M. Macharia)

## 1. Datasets

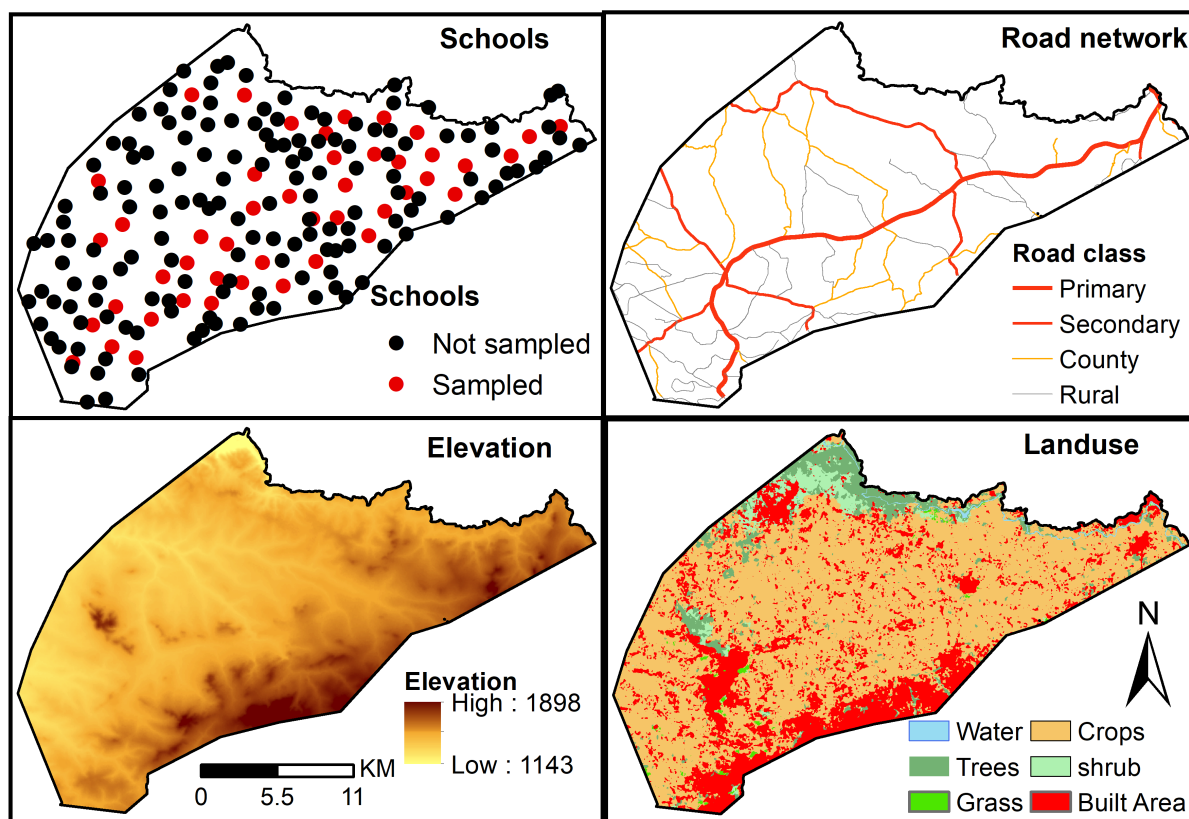

Figure S2.1: The spatial layers used to compute geographic access and school catchment areas: school locations and factors that affect travel

## 2. Travel time and school Catchment areas (SCAs)

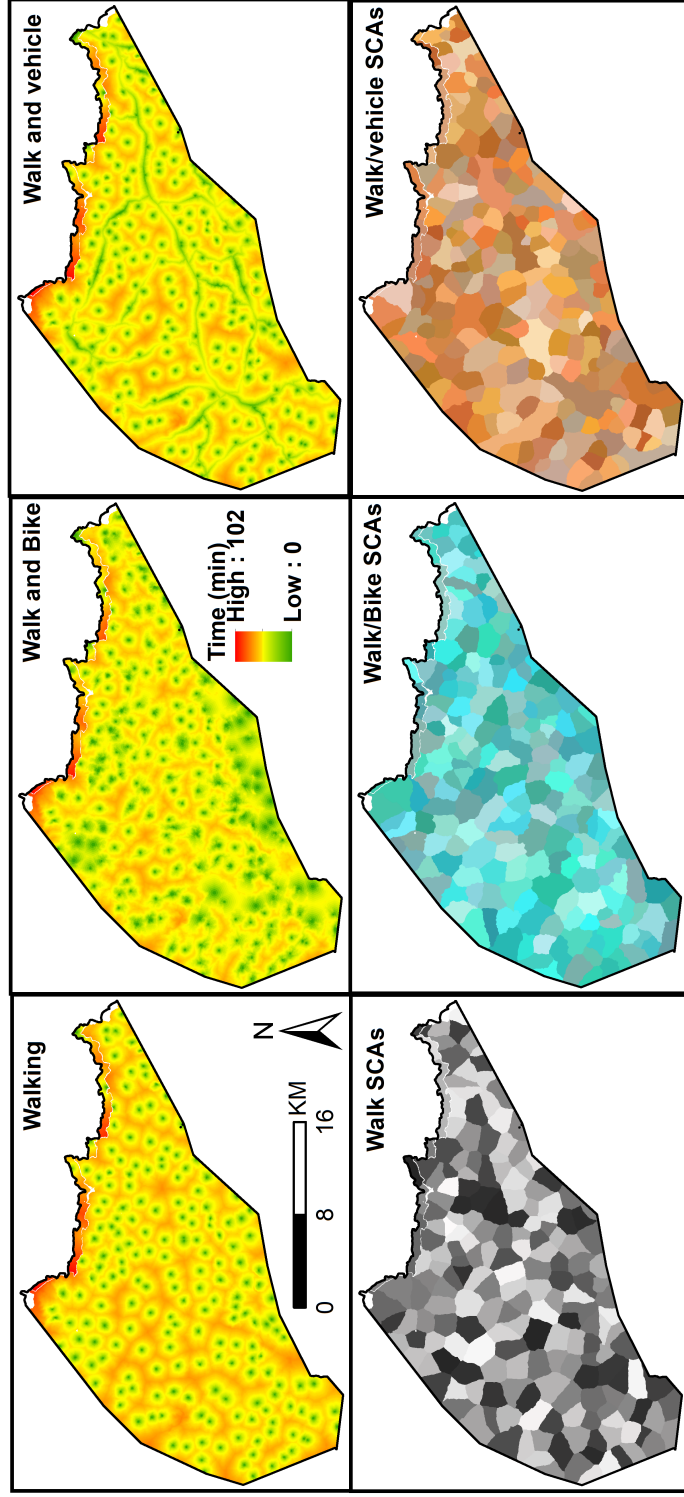

Figure S2.2: Travel time (in minutes) to the nearest primary school based on three travel scenarios (W, WB and WM) and their corresponding SCAs

## SCA and household locations

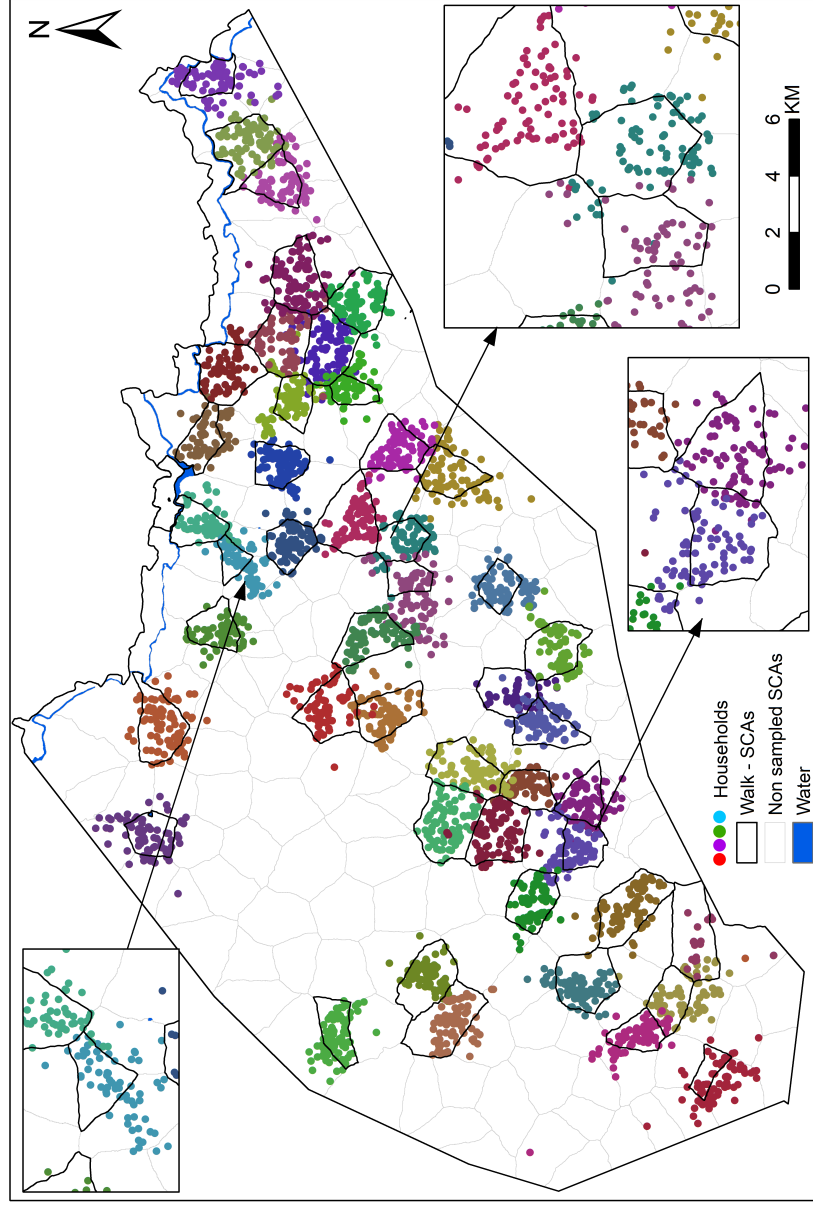

Figure S2.3: Spatial overlay of modelled SCAs (model W- walking only scenario) and household location of school-going children.

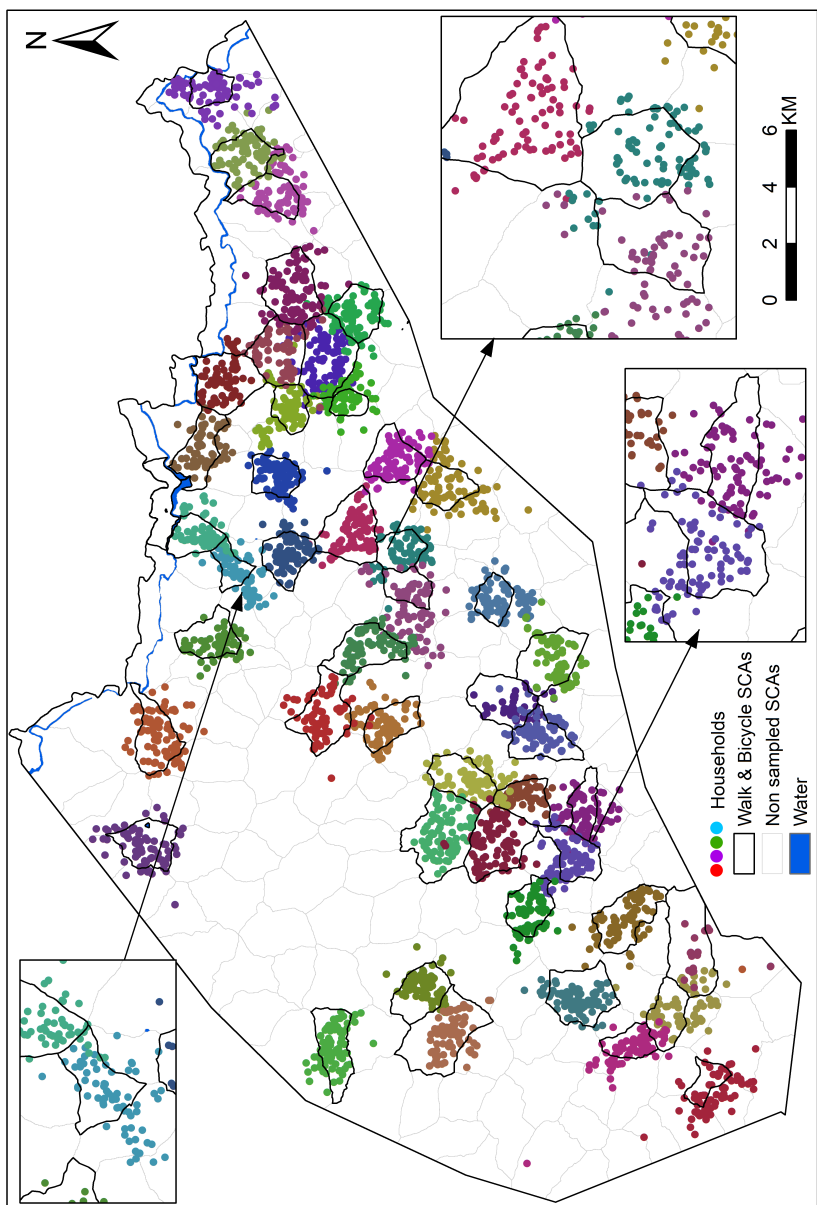

Figure S2.4: Spatial overlay of modelled SCAs (model WB- walking/bicycling scenario) and household location of school-going children.

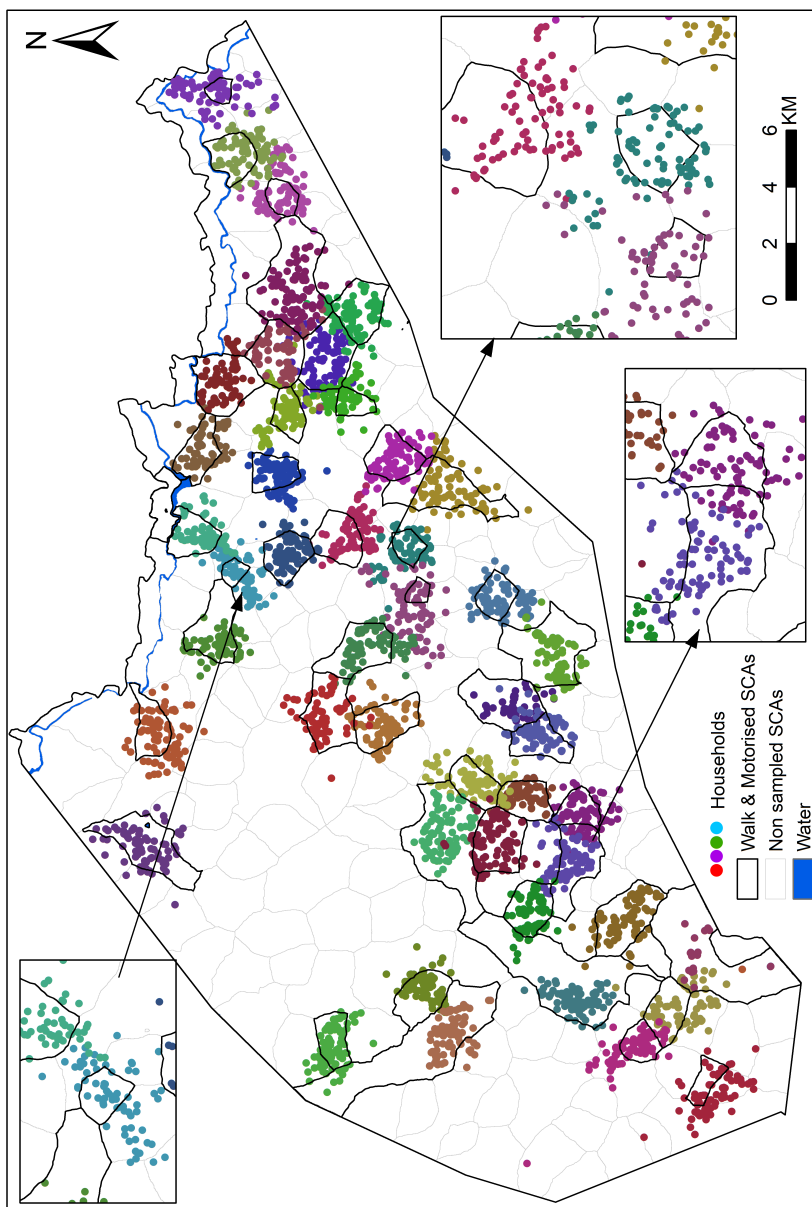

Figure S2.5: Spatial overlay of modelled SCAs (model WM-walking/motorized scenario) and household location of school-going children.

Table S2.1: Proportion of children within modelled SCAs from the overlay SCAs and geolocated household locations for Model W (Figure S2.3), Model WB (Figure S2.4) and Model WM (Figure S2.5)

| Model | HHs within SCAs (%) | Range of HHs within SCAs per school (%) | % of SCAs with $\geq 50\%$ HHs | % of SCAs with $\geq 70\%$ HHs | % of SCAs with $\geq 90\%$ HHs |
|-------|---------------------|-----------------------------------------|--------------------------------|--------------------------------|--------------------------------|
| W     | 74.4                | 27.7% - 99.1%                           | 89.1%                          | 67.4%                          | 19.6%                          |
| WB    | 72.8                | 29.8% - 99.1%                           | 82.1%                          | 63.0%                          | 17.4%                          |
| WM    | 68.8                | 22.8% - 100%                            | 76.1%                          | 56.5%                          | 21.7%                          |

## Mesh

Figure S2.6 shows the mesh used to define the piece-wise linear approximation of the Gaussian field  $S(x)$

Constrained refined Delaunay triangulation

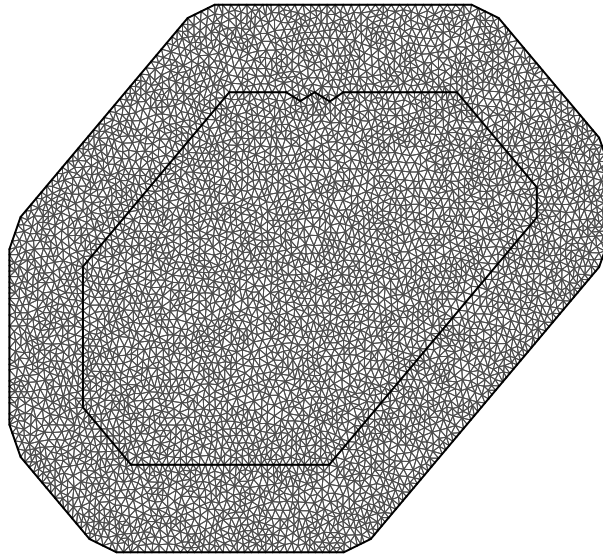

Figure S2.6: Mesh generated using the `inla.mesh.2d` function from the INLA R package (Krainski et al., 2018).

## References

Krainski, E., Gómez Rubio, V., Bakka, H., Lenzi, A., Castro-Camilo, D., Simpson, D., Lindgren, F., Rue, H., 2018. Advanced Spatial Modeling with Stochastic Partial Differential Equations Using R and INLA. doi:10.1201/9780429031892.
